# Supplementary material
Source: publisher site journal article supplement (http://www.aging-us.com/papers/v7/n10/pdf/100833.pdf)
Supplement: Supplementary file 1 [file 100833.pdf]

Aging
